# Supplementary material for: Exploring Poly(ethylene glycol)-Polyzwitterion Diblock Copolymers as Biocompatible Smart Macrosurfactants Featuring UCST-Phase Behavior in Normal Saline Solution
Source: PubMed Central journal article supplement (PMC6414896; doi:10.3390/polym10030325), 2018-03-15
Supplement: polymers-10-00325-s001.pdf [file polymers-10-00325-s001.pdf]

# Supplementary Material

## Exploring Poly(ethylene glycol)-Polyzwitterion Diblock Copolymers as Biocompatible Smart Macro surfactants Featuring UCST-Phase Behavior in Normal Saline Solution

Noverra M. Nizardo <sup>1</sup>, Dirk Schanzenbach, <sup>1</sup> Eric Schönemann <sup>1</sup>  
and André Laschewsky <sup>1,2\*</sup>

<sup>1</sup> University of Potsdam, Institute of Chemistry, Karl-Liebknecht-Str. 24-25, D-14476 Potsdam-Golm, Germany; e-mails: nizardo@uni-potsdam.de (N.M.N.), dschanz@uni-potsdam.de (D.S.), eschoenemann@uni-potsdam.de (E.S.), laschews@uni-potsdam.de (A.L.)

<sup>2</sup> Fraunhofer Institute of Applied Polymer Research IAP Geiselberg-Str. 69, D-14476 Potsdam-Golm, Germany; e-Mail: andre.laschewsky@iap.fraunhofer.de (A.L.)

\* Author to whom correspondence should be addressed; e-Mail: laschews@uni-potsdam.de (A.L.); Fax: +49-331-997-5036. ORCID number 0000-0003-2443-886X.

### 1. Polymer synthesis

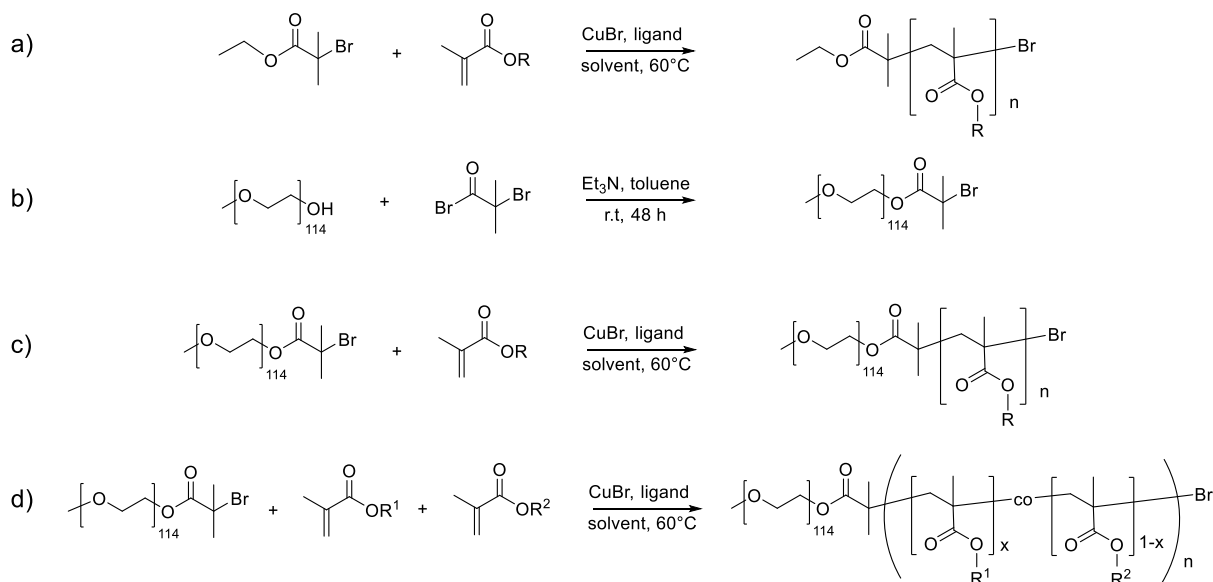

**Figure S1.** Synthetic pathways to : (a): homopolymers; (b) macroinitiator; (c) block copolymers; (d) statistical block copolymers.

## 2. Polymer characterization

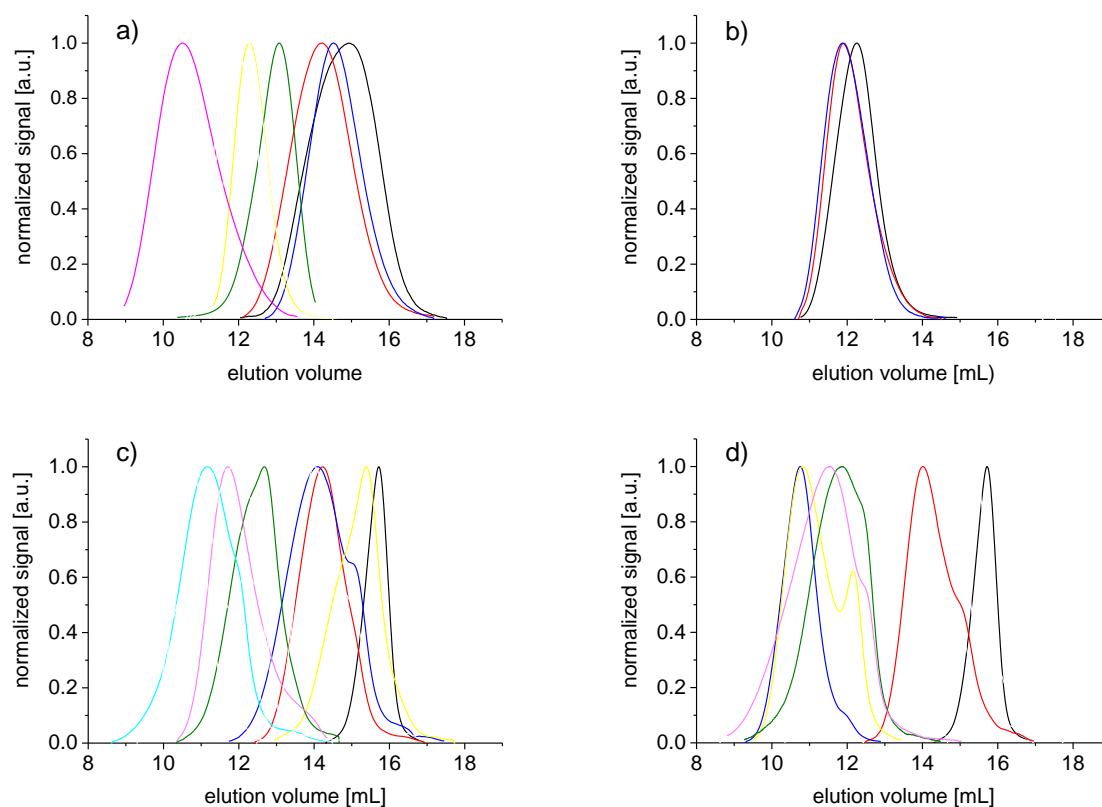

**Figure S2.** SEC elugrams of the polymer studied (eluent: hexafluoroisopropanol (HFIP) containing 50 mM of sodium trifluoroacetate, calibration with narrowly distributed poly(methyl methacrylate) standards.

- a) homopolymers: (—) = SPE-1, (—) = SPE-2, (—) = SPE-3, (—) = ZPE-1, (—) = ZPE-2, (—) = ZPE-3;
- b) statistical copolymers: (—) = PSPE-co-ZPE-1, (—) = PSPE-co-ZPE-2, (—) = PSPE-co-ZPE-3;
- c) macroinitiator **mPEG-Br** (—), and block copolymers: (—) = PEG-*b*-PSPE-1, (—) = PEG-*b*-PSPE-2, (—) = PEG-*b*-PSPE-3, (—) = PEG-*b*-PSPE-4, (—) = PEG-*b*-PSPE-5; (—) = PEG-*b*-PSPE-6;
- d) macroinitiator **mPEG-Br** (—), block copolymers: (—) = PEG-*b*-PSBE-1, (—) = PEG-*b*-PSBE-2, and statistical block copolymers: (—) = PEG-*b*-PZPE-1, (—) = PEG-*b*-P(SPE-co-ZPE)-1, (—) = PEG-*b*-P(SPE-co-ZPE)-2.

### 3. Polymer studies in aqueous solution

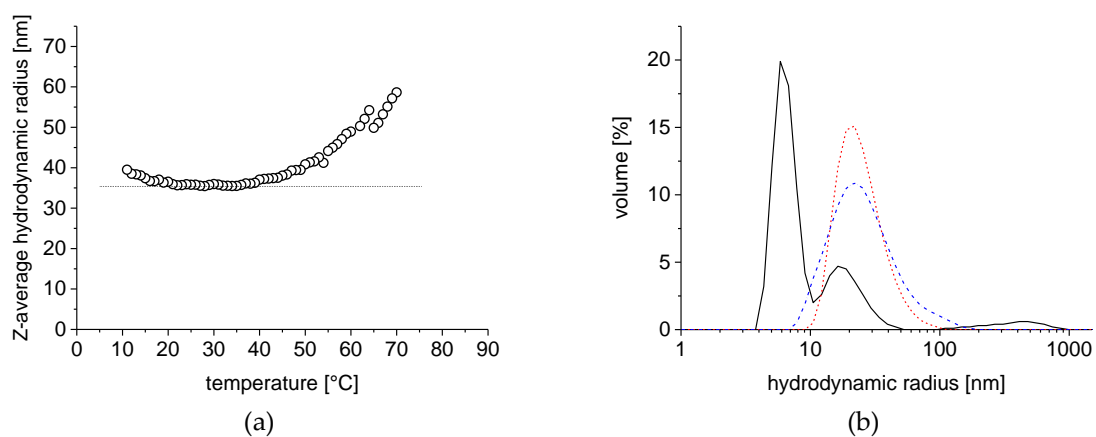

**Figure S3.** Temperature dependent evolution of the hydrodynamic radius of solutions of block copolymer PEG-*b*-PSBE-1 in water at 30.0 g L<sup>-1</sup>: (a) average hydrodynamic radius  $R_h$  (cooling run, the dotted line is meant as a guide to the eye); (b) distributions of the hydrodynamic radii at 20 °C ( - - - - - ), 40 °C ( - - - - - ), and 70 °C ( ——— ).
